# Supplementary material
Source: publisher figshare collection journal article supplement (https://aacr.figshare.com/articles/dataset/_/22402397)
Supplement: Supplementary file 1 [file 39848192]

**Supplementary Table S2.** Estimation of CSC frequency in unsorted, EpCAM+CD133+ and EpCAM+CD133- fractions from GC16 xenografts

| Gastric cancer cell source                              | Cell dose | Number of mice with tumors/Number of mice injected (%) |                             |                          |
|---------------------------------------------------------|-----------|--------------------------------------------------------|-----------------------------|--------------------------|
|                                                         |           | Unsorted                                               | Ep+CD133+                   | Ep+CD133-                |
| GC16                                                    | 25000     | 5/5 (100%)                                             | ND                          | 5/5 (100%)               |
|                                                         | 10000     | 4/8 (50%)                                              | ND                          | 8/8 (100%)               |
|                                                         | 2000      | 3/14 (21%)                                             | 1/7 (14%)                   | 4/14 (29%)               |
|                                                         | 500       | 0/14 (0%)                                              | 0/10 (0%)                   | 0/14 (0%)                |
|                                                         | 100       | 0/8 (0%)                                               | 0/4 (0%)                    | 0/8 (0%)                 |
|                                                         | 50        | 0/2 (0%)                                               | 0/2 (0%)                    | 0/2 (0%)                 |
|                                                         | 20        | 0/19 (0%)                                              | 0/19 (0%)                   | 0/19 (0%)                |
| Estimated stem cell frequency<br>(Confidence intervals) |           | 1 in 10885<br>(5949-19917)                             | 1 in 18863<br>(2688-132385) | 1 in 4872<br>(2768-8573) |

Pairwise tests for differences in stem cell frequencies

| Group 1   | Group 2   | $\chi^2$ | DF | P-value |
|-----------|-----------|----------|----|---------|
| Ep+CD133+ | Ep+CD133- | 2.43     | 1  | 0.119   |
| Ep+CD133+ | Unsorted  | 0.319    | 1  | 0.572   |
| Ep+CD133- | Unsorted  | 3.35     | 1  | 0.0672  |
